# Supplementary material for: A Reduction in Health Care Expenditures Linked to Mental Health Service Use Among Adults With Chronic Physical Conditions
Source: Atypon-hosted journal article supplement (doi:10.1176/appi.ps.202000161), 2021-05-04
Supplement: appi.ps.202000161.ds001.pdf [file appi.ps.202000161.ds001.pdf]

Supplementary Table 1

| <b>Clinical Classification Codes and associated ICD-9 codes: Mental health and alcohol/drug abuse disorders</b> |                                      |                    |               |               |               |               |
|-----------------------------------------------------------------------------------------------------------------|--------------------------------------|--------------------|---------------|---------------|---------------|---------------|
| <b>Conditions</b>                                                                                               | <b>Clinical Classification Codes</b> | <b>ICD-9 codes</b> |               |               |               |               |
| <b>Adjustment disorders</b>                                                                                     | <b>650</b>                           | 3090               | 30923         | 30929         | 30982         | 3099          |
|                                                                                                                 |                                      | 3091               | 30924         | 3093          | 30983         |               |
|                                                                                                                 |                                      | 30922              | 30928         | 3094          | 30989         |               |
| <b>Anxiety disorder</b>                                                                                         | <b>651</b>                           | 29384              | 30010         | 30029         | 3089          | 31321         |
|                                                                                                                 |                                      | 30000              | 30020         | 3003          | 30981         | 31322         |
|                                                                                                                 |                                      | 30001              | 30021         | 3005          | 3130          | 3133          |
|                                                                                                                 |                                      | 30002              | 30022         | 30089         | 3131          | 31382         |
|                                                                                                                 |                                      | 30009              | 30023         | 3009          | 31383         | 3080 - 3084   |
| <b>Mood disorders</b>                                                                                           | <b>657</b>                           | 29600 - 29606      | 29650 - 29656 | 29689         | 29383         | 29630 - 29636 |
|                                                                                                                 |                                      | 29610 - 29616      | 29660 - 29666 | 29690         | 29680 - 29682 | 3004          |
|                                                                                                                 |                                      | 29640 - 29646      | 2967          | 29699         | 29620 - 29626 | 311           |
| <b>Schizophrenia and other psychotic disorders</b>                                                              | <b>659</b>                           | 29381              | 29510 - 29515 | 29540 - 29545 | 29570 - 29575 | 2970 - 2973   |
|                                                                                                                 |                                      | 29382              | 29520 - 29525 | 29550 - 29555 | 29580 - 29595 | 2978 - 2984   |
|                                                                                                                 |                                      | 29500 - 29505      | 29530 - 29535 | 29560 - 29565 | 29590 - 29595 | 2988 - 2989   |
| <b>Alcohol related disorders</b>                                                                                | <b>660</b>                           | 2918               | 29189         | 76071         | 2910 - 2915   | 30390 - 30393 |
|                                                                                                                 |                                      | 29181              | 2919          | 9800          | 30300 - 30303 | 30500 - 30503 |
|                                                                                                                 |                                      | 29182              |               |               |               |               |
| <b>Drug-related disorders</b>                                                                                   | <b>661</b>                           | 2920               | 30400 - 30403 | 30470 - 30473 | 30560 - 30563 | 76073         |
|                                                                                                                 |                                      | 29211              | 30410 - 30413 | 30480 - 30483 | 30570 - 30573 | 76073         |
|                                                                                                                 |                                      | 29212              | 30420 - 30423 | 30490 - 30493 | 30580 - 30583 | 76075         |
|                                                                                                                 |                                      | 2922               | 30430 - 30433 | 30520 - 30523 | 30590 - 30593 | 7795          |
|                                                                                                                 |                                      | 29281 - 29285      | 30440 - 30443 | 30530 - 30533 | 64830 - 64833 | 96500 - 96502 |
|                                                                                                                 |                                      | 29289              | 30450 - 30453 | 30540 - 30543 | 64834         | 96509         |
|                                                                                                                 |                                      | 2929               | 30460 - 30463 | 30550 - 30553 | 65550 - 65553 | V6542         |
